# Supplementary material
Source: PubMed Central journal article supplement (PMC3136299)
Supplement: 1101414108_pnas.1101414108_SI.pdf [file 1101414108_pnas.1101414108_SI.pdf]

# Supporting Information

Harris et al. 10.1073/pnas.1101414108

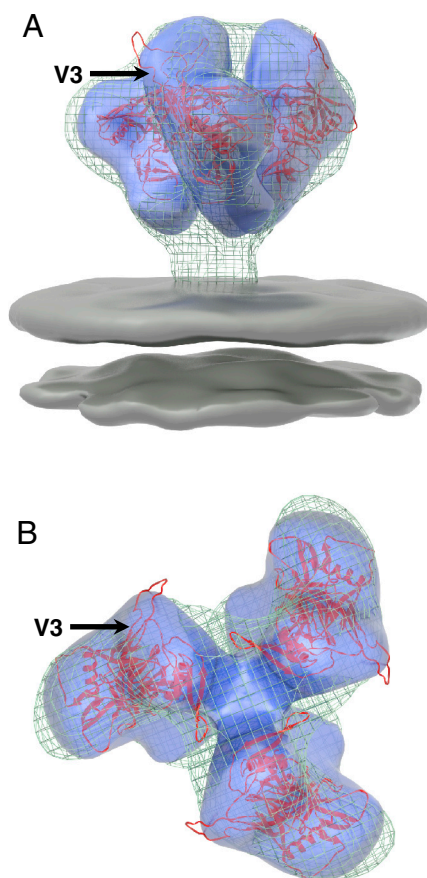

**Fig. S1.** Density map and molecular structure of KNH1144 glycoprotein gp140 trimers with a V3-containing gp120. (*A* and *B*) Transparent isosurface representations of the density map for trimeric KNH1144 gp140 (in blue), shown superposed with the density map (wire mesh) and a molecular model for trimeric gp120 containing the V3 loop (Protein Data Bank ID 2B4C) via docking of coordinates into the gp140 density. The arrow points to the V3 loop region on one gp140 protomer. The density representing the lipid bilayer is colored gray in *A*.
